# Supplementary material for: EBV Tegument Protein BNRF1 Disrupts DAXX-ATRX to Activate Viral Early Gene Transcription
Source: PLoS Pathog. 2011 Nov 10;7(11):e1002376. doi: 10.1371/journal.ppat.1002376 (PMC3213115; doi:10.1371/journal.ppat.1002376)
Supplement: Table S3 — Primers used for real time PCR detection of viral gene expression. (XLS) [file ppat.1002376.s006.xls]

## Sheet: Sheet1
Primer code name	Sequence (5'head in caps, 3'tail in lower case)	Primer name
Primers for first set of 300aa deletions
oPL2898	GAC GAT GAC AAG CTT GAA GAG AGG gtt aat gca ata gca tca tcg ctg	BNRF1-d1 aa 3-300
oPL2899	CAG CAC CCC GGC CTC TTT CCC TTC tct ccg tct tac gag ttg ccc tgg	BNRF1-d2 aa300-600
oPL2900	GAT GTG GAC GAG AGC ATG GAC ATC cag cgg gga gtg acc atc act atg	BNRF1-d3 aa600-900
oPL2901	CTG GTG GAG ATG GCC CTG GCC GGG ctg cct tgt tgg gtg caa ggc tcg	BNRF1-d4 aa900-1200
oPL2979	AGG GAC TCT GCC CTG GCA GGC cac ggt cgc ccc tcc gag tg	BNRF1-d5 aa1100-1312
Primers for second set of 60aa deletions
oPL3253	CCC GGC CTC TTT CCC TTC aag gga gga gag ggc cta c	BNRF1-d21 aa300-360
oPL3303	g tag gcc ctc tcc tcc ctt GAA GGG AAA GAG GCC GGG	BNRF1-d21 reverse
oPL3254	GGG GTG CCG GTC GTG GCC tgc ccc tac gcc gaa agt tc	BNRF1-d22 aa350-410
oPL3304	ga act ttc ggc gta ggg gca GGC CAC GAC CGG CAC CCC	BNRF1-d22 reverse
oPL3255	T CTC ATA ATG TTG GGG CCA TTC aag ggg ggt ctg ctg ttg	BNRF1-d23 aa400-460
oPL3305	caa cag cag acc ccc ctt GAA TGG CCC CAA CAT TAT GAG A	BNRF1-d23 reverse
oPL3256	CC CCG GGC CCC AGT GCT aca gtg agg cag cga ggg	BNRF1-d24 aa450-510
oPL3306	ccc tcg ctg cct cac tgt AGC ACT GGG GCC CGG GG	BNRF1-d24 reverse
oPL3257	CAG TTT GTC AGC AGC TAC TTC gtt tcc acc gcc gag atg	BNRF1-d25 aa500-560
oPL3307	cat ctc ggc ggt gga aac GAA GTA GCT GCT GAC AAA CTG	BNRF1-d25 reverse
oPL3258	CC ACG GTT CCC CTC GGT GGA tct ccg tct tac gag ttg ccc	BNRF1-d26 aa550-600
oPL3308	ggg caa ctc gta aga cgg aga TCC ACC GAG GGG AAC CGT GG	BNRF1-d26 reverse
Primers for cloning out Daxx interaction domain only (DID)
oPL3561	AT GTG GAC GAG AGC ATG GAC ATC ggt cgc ccc tcc gag tga gt	BNRF1 d600-1310aa F
oPL3562	ac tca ctc gga ggg gcg acc GAT GTC CAT GCT CTC GTC CAC AT	BNRF1 d600-1310aa R
*Only the first set of deletions were cloned using single primers as suggested in O Makarova, E Kamberov, B Margolis. 2000 Nov. Generation of deletion and point mutations with one primer in a single cloning step. Biotechniques 29(5):970-2
*The first and second of deletions were cloned using wildtype BNRF1 as the template; while DID is cloned by deleting the 600aa through the C' end on the BNRF1-d1 deletion construct template
